1 ***AGL16* regulates genome-wide gene expression and**  
2 **flowering time with partial dependency on *SOC1* in**  
3 ***Arabidopsis***

4 Xue Dong<sup>1,4</sup>, Li-Ping Zhang<sup>1</sup>, Dong-Mei Yu<sup>1</sup>, Fang Cheng<sup>1</sup>, Yin-Xin Dong<sup>1</sup>,  
5 Xiao-Dong Jiang<sup>1,3</sup>, Fu-Ming Qian<sup>1,3</sup>, Franziska Turck<sup>2</sup>, Jin-Yong Hu<sup>1,\*</sup>

6 1. CAS Key Laboratory for Plant Diversity and Biogeography of East Asia,  
7 Kunming Institute of Botany, Chinese Academy of Sciences. Kunming 650201,  
8 Yunnan Province, China.

9 2. Department of Plant Development, Max-Planck-Institute for Plant Breeding  
10 Research, Carl-von-Linne Weg 10, 50829 Cologne, Germany.

11 3. Kunming College of Life Sciences, University of Chinese Academy of  
12 Sciences, Kunming 650201, Yunnan Province, China.

13 4. Germplasm Bank of Wild Species, Kunming Institute of Botany, Chinese  
14 Academy of Sciences, Kunming, Yunnan 650201, China

15 \* **For correspondence:** [hujinyong@mail.kib.ac.cn](mailto:hujinyong@mail.kib.ac.cn).

16

17

## 18 **Abstract**

19 Flowering transition is pivotal and tightly regulated by complex  
20 gene-regulatory-networks, in which AGL16 plays important roles. But the  
21 molecular function and binding property of AGL16 is not fully explored *in vivo*.  
22 With ChIP-seq and comparative transcriptomics approaches, we characterized  
23 the AGL16 targets spectrum and tested its close molecular and genetic  
24 interactions with *SOC1*, the key flowering integrator. AGL16 bound to  
25 promoters of more than 2000 genes via CArG-box motifs that were highly  
26 similar to that of *SOC1*. Being consistent with this, AGL16 formed protein  
27 complex and shared a common set of targets with *SOC1*. However, only very  
28 few genes showed differential expression in the *agl16-1* loss-of-function  
29 mutant, whereas in the *soc1-2* knockout background, AGL16 repressed and  
30 activated the expression of 375 and 182 genes, respectively, with more than a  
31 quarter of the DEGs were also bound by AGL16. AGL16 targeted potentially to  
32 about seventy flowering time genes involved in multiple pathways.  
33 Corroborating with these, *AGL16* repressed the flowering time stronger in  
34 *soc1-2* than in Col-0 background. These data reveals that AGL16 regulates  
35 gene expression and flowering time with a partial dependency on *SOC1*  
36 activity. Moreover, AGL16 participated in the regulation of water loss and seed  
37 dormancy. Our study thus defines the AGL16 molecular spectrum and  
38 provides insights underlining the molecular coordination of flowering and  
39 environmental adaptation.

40

## 41 Introduction

42 Timely transitions from vegetative to reproductive growth (floral transition) and  
43 from dormant to germinating seeds (dormancy release) determine the capacity  
44 of plants to adapt to changing environments, thus these processes are under  
45 tight control by complex interactions between endogenous signals and  
46 exogenous environmental factors (Andres and Coupland 2012; Michaels 2009;  
47 Nee, Xiang, and Soppe 2017). The gene-regulatory-network (GRN) controlling  
48 floral transition converges at several floral integrator genes like  
49 *SUPPRESSOR OF CONSTANS 1 (SOC1)* and *FLOWERING LOCUS T (FT)*.  
50 These genes often encode transcription regulators controlling the transcription  
51 of their downstream targets by binding to specific *cis*-motifs, for example  
52 CArG-boxes (Andres and Coupland 2012; Michaels 2009; Fornara, de  
53 Montaigu, and Coupland 2010). CArG-box motifs are binding sites specific for  
54 MADS-box transcription factors (TFs) like SOC1, FLOWERING LOCUS C (FLC),  
55 SHORT VEGETATIVE PHASE (SVP) and SEPALLATA 3 (SEP3) (Gregis et al.  
56 2013; Mateos et al. 2015; Mateos et al. 2017; Kaufmann et al. 2009; Deng et al.  
57 2011; Immink et al. 2009; Immink et al. 2012; Kaufmann et al. 2010; Tao et al.  
58 2012; Aerts et al. 2018). These MADS-box TFs often form homo- and/or  
59 hetero- protein complexes that act in concert and bind to the CArG-box motifs  
60 in promoters of more than hundreds of downstream genes to regulate  
61 flowering time and other developmental processes of *Arabidopsis thaliana*.

62 SOC1 is one key flowering promoter integrating signals from photoperiod,  
63 temperature, hormones and age-related pathways (Lee and Lee 2010). SOC1  
64 forms protein complex with AGL24 to activate *LFY* and *AP1* to initiate and  
65 maintain flower meristem identity but represses *SEP3* to prevent premature  
66 differentiation of floral meristem (Lee et al. 2008). SOC1 can promote the  
67 expression of *TARGET OF FLC AND SVP1 (TFS1)* via recruiting histone  
68 demethylase RELATED TO EARLY FLOWERING 6 (REF6) and chromatin  
69 remodeler BRAHMA (BRM), and cooperates with SQUAMOSAL PROMOTER  
70 BINDING PROTEIN-LIKE 15 (SPL15) to modulate their targets expression  
71 thereby regulating flowering time (Richter et al. 2019; Hyun et al. 2016). SOC1

---

72 forms a set of heterologous complexes with other MADS-box transcription  
73 factors, for example *AGL16* (de Folter et al. 2005; Immink et al. 2009).  
74 Furthermore, *SOC1* times flowering downstream of several hormone signaling  
75 pathways including GA, ABA and BRs (Hwang et al. 2019; Jung et al. 2012; Li  
76 et al. 2017) and of nutrient status (Yan et al. 2021; Olas et al. 2019; Liu et al.  
77 2013). Interestingly, profiling of *SOC1* targets also identifies genes involved in  
78 the signaling processes of these hormones and nutrients (Immink et al. 2012;  
79 Tao et al. 2012). However, the biological significance of these molecular  
80 interactions remains to be explored further.

81 *AGL16* represses flowering with dependency on the genetic background, the  
82 photoperiod of growth conditions, and gene dosages in *A. thaliana* (Hu et al.  
83 2014). Only under the inductive long-day conditions loss-of-function mutants  
84 for *AGL16* show early flowering especially in the functional *FRI-FLC*  
85 background (Johanson et al. 2000; Michaels and Amasino 2001; Hu et al.  
86 2014). *AGL16* expression can be modulated by the level of the  
87 Brassicaceae-specific *miR824*, for which natural variation has been reported  
88 (Hu et al. 2014; Kutter et al. 2007; de Meaux et al. 2008; Fahlgren et al. 2007;  
89 Rajagopalan et al. 2006). Interestingly, changes in *miR824* expression result in  
90 a significant modification of the plant flowering (Hu et al. 2014). *AGL16* acts in  
91 flowering time regulation via transcriptional regulation of *FT*, whose expression  
92 is also regulated by other MADS-box repressors such as *SVP* and *FLC* and  
93 other TFs (Aukerman and Sakai 2003; Searle et al. 2006; Jung et al. 2007;  
94 Castillejo and Pelaz 2008; Li et al. 2008; Mathieu et al. 2009). *AGL16* forms  
95 complexes with *SVP* and *FLC*, and mildly represses their expression (Hu et al.  
96 2014). *AGL16* is a direct downstream target of both *FLC* and *SVP*, but the  
97 expression of *AGL16* changes only weakly in loss-of-function mutants of both  
98 genes (Deng et al. 2011; Gregis et al. 2013; Mateos et al. 2015).  
99 Yeast-two-hybrids assays suggest that *AGL16* interacts with *SOC1* and other  
100 MADS-box TFs and it has been hypothesized that *AGL16* could modulate the  
101 *SOC1* expression (de Folter et al. 2005; Immink et al. 2012; Immink et al.  
102 2009). However, the exact *AGL16* target spectrum and the impact of  
103 interactions between *AGL16* and its partners remain under-explored.

104 In this study, we examined the molecular profiles that AGL16 bound and tested  
105 the molecular and genetic interactions between *AGL16* and *SOC1*. We found  
106 that, in contrast to its mild effects in flowering time regulation in Col-0  
107 background, AGL16 could in fact bind to more than 2000 target genes that  
108 were involved in regulation of flowering time and other biological processes.  
109 We confirmed the molecular and genetic interactions of AGL16 with SOC1 and  
110 found that they shared many common targets. We demonstrated that the  
111 regulatory roles of AGL16 on genome-wide gene expression and flowering  
112 time depended partially on the SOC1 activity.

113

## 114 **Results**

### 115 **AGL16 binds to a large set of genomic segments with CA<sub>r</sub>G boxes**

116 We profiled AGL16 binding sites by a ChIP-seq approach (chromatin  
117 immuno-precipitation followed by sequencing). We used a line expressing  
118 *AGL16* fused to a combined Yellow Fluorescent Protein (YFP) -HA epitope tag  
119 under the control of the Cauliflower Mosaic Virus 35S promoter (*AGL16OX*),  
120 which restores the early flowering of *agl16-1* to wild type Col-0 level (Fig. S1)  
121 (Hu et al. 2014). In two independent trials, we identified respectively 5463 and  
122 3294 DNA segments statistically enriched for AGL16 binding, of which 3086  
123 were shared (Table S2, S3). Most of the peaks were around 150-500 bp in  
124 both trials (Fig. S2). To test whether these segments were real binding sites for  
125 AGL16, we carried out ChIP-qPCR assays with two independent chromatin  
126 preparations for 20 peaks identified by ChIP-seq. These efforts confirmed 12  
127 regions bound by AGL16-YFP-HA with a minimum two-fold enrichment in the  
128 *AGL16OX* line compared to *agl16-1* background (Fig. 1). Hence, a majority  
129 proportion of peaks detected via ChIP-seq method were reproducibly  
130 enriched.

131 Peaks bound by AGL16 were annotated using Arabidopsis TAIR10 data to  
132 profile their distribution to genomic features (Fig. 2). The peaks from both trials  
133 were centered to the 3 Kb regions around transcriptional start sites (TSS; Fig.  
134 2B). Around 60% of peaks located in the 1 Kb regions surrounding TSS (Fig.  
135 2C; Table S3). About 10% of peaks were located in the 1-2 kb promoter  
136 regions upstream of TSS, while 10-12% of peaks were in exons/introns. Thus,  
137 AGL16 bound to DNA fragments close to TSS of a large set of genes. The  
138 2339 genes with peaks mapped to gene body or up to 2 Kb upstream of their  
139 TSS were taken as AGL16 targets (Table S3).

140 We next searched for potential cis-elements in the common peaks bound by  
141 AGL16 using HOMER, which could predict new motifs and identify known  
142 motifs (Heinz et al. 2010). This analysis reported a *de novo* CA<sub>r</sub>G-box motif

143 CCATTTTGG for AGL16 in 707 peaks (24.2% of all common peaks; *Fisher*  
144  $P=1e-340$ , in comparison to 3.8% at genome level; Fig. 2D, Table S3). Ten  
145 other CArG-box motifs were also significantly enriched, and matched to the  
146 known motifs of SVP, SOC1, SEP3, TAGL1, AGL63, and other MADS-box TFs,  
147 most of which could potentially interact with AGL16 (Fig. 2D; Fig. S3; Table S3).  
148 The *de novo* and the ten significantly enriched CArG-box motifs were all  
149 distributed around the peak center, indicating that AGL16 bound to its targets  
150 via the cluster of CArG-box motifs, just like SOC1 and other MADS-box  
151 proteins did (Tao et al. 2012; Immink et al. 2012; Deng et al. 2011). There were  
152 also other motifs significantly enriched in the AGL16 bound peaks, such as  
153 those bound by TCPs (321 peaks), bHLHs (1131), C2C2 DOFs (2524),  
154 WRKYs (1039). However, these motifs were not in the peaks center. Since  
155 AGL16 modulated significantly the flowering time in *Arabidopsis* (Hu et al.  
156 2014), we next asked which flowering time genes could be targeted by AGL16.

#### 157 **AGL16 targets flowering time genes in multiple pathways**

158 The *Arabidopsis* genome contains ~400 flowering time genes, among which  
159 around 70 were targeted by AGL16 (Fig. 3; Table S3). This number was  
160 significantly larger than randomly expected (*Yates' Chi-square test*,  $p<0.0001$ ).  
161 Consistent with the described photoperiod dependency for AGL16-mediated  
162 flowering regulation (Hu et al. 2014), 37 genes (for example *AGAMOUS LIKE*  
163 *15/16/18* (*AGL15/AGL16/AGL18*), *CONSTANS LIKE 1/3/4/5* (*COL1/3/4/5*),  
164 *TWIN SISTER OF FT* (*TSF*) and *MOTHER OF FT* (*MFT*), etc.) were related to  
165 photoperiod and circadian clock pathways (Bouche et al. 2016). Ten genes  
166 (like *AGL19* and *SVP*, etc.) were in the vernalization and ambient temperature  
167 pathway, seven genes were involved in the Gibberellin Acid (GA) pathway, and  
168 nine genes are integrators or related to meristem response and developmental  
169 process. Four genes bound by AGL16 were not clearly defined for the  
170 flowering pathways (Zhao et al. 2011; Boxall et al. 2005; Xiao et al. 2009). It  
171 should be further noted that, besides GA, jasmonate acid (JA) signaling could  
172 also time flowering as well (Kazan and Manners 2013; Zhai et al. 2015; Wang  
173 et al. 2017; Bao et al. 2019). Genes in this pathway were directly targeted by  
174 AGL16 (Table S3), thus it's possible that AGL16 modulates flowering time also

---

175 through this pathway. Taken together, AGL16 might impact several flowering  
176 pathways, and the alteration of flowering time in mutants of *AGL16* could be a  
177 net effect of multiple flowering pathways.

### 178 **AGL16 binds to *SOC1* promoter**

179 The floral integrator gene *SOC1* was one of the targets bound by AGL16 (Fig.  
180 4A; Table S3). AGL16 interacted with three DNA segments (peaks 1389, 1390  
181 and 1391) in the promoter region of *SOC1* that harbored several CArG-motifs.  
182 Peak 1390 overlapped with a region bound by *SOC1* itself (*SOC1* binding  
183 region 1) (Tao et al. 2012), while peak 1389 overlapped with regions previously  
184 shown to be targeted by SVP (Tao et al. 2012; Mateos et al. 2015) or FLC  
185 (Deng et al. 2011; Mateos et al. 2015). An independent ChIP-qPCR assay  
186 confirmed AGL16 binding on all three peaks with the binding on peaks 1389  
187 and 1391 relatively stronger than on peak 1390 (Fig. 5B). The second segment  
188 bound by *SOC1* itself (*SOC1* binding region 2 or fragment 7) was not targeted  
189 by AGL16. As AGL16 forms protein complexes with SVP and FLC (Hu et al.  
190 2014), it is likely that AGL16 binds target regions together with these two  
191 MADS-box proteins, thereby participating in modulating target expression.  
192 However, the *SOC1* transcription was only weakly affected by loss-of-function  
193 of *AGL16* in the Col-0 background and not significantly in the Col-*FR1*  
194 background (Fig. 5C; Fig. S4), a pattern that had also been observed for SVP  
195 (Hu et al. 2014).

### 196 **AGL16 can form protein complex with *SOC1* and co-targets a common** 197 **set of genes**

198 Previously, AGL16 was been demonstrated to form heterodimer with *SOC1*  
199 (Fig. S10) (de Folter et al. 2005; Immink et al. 2009). We verified this  
200 interaction with Yeast-2-Hybrid (Y2H) and bimolecular fluorescence  
201 complementation (BiFC) techniques. Y2H assays confirmed interactions  
202 between *SOC1* and AGL16 (Fig. 5A), which was as strong as the previously  
203 reported direct interaction between AGL16 and SVP (Hu et al. 2014). LHP1



---

204 was used as a negative control. BiFC fusing the N-terminal half of yellow  
205 fluorescent protein (nYFP) with AGL16 (*35S:AGL16-nYFP*) and the C-terminal  
206 of YFP with SOC1 (*35S:SOC1-cYFP*) detected an interaction of AGL16 with  
207 SOC1 in the nuclei of *Agrobacterium* infiltrated tobacco leaves (Fig. 5B).  
208 Hence AGL16 and SOC1 can form complexes, which may contribute to the  
209 regulation of the expression of downstream targets.

210 We next examined whether AGL16 and SOC1 had common targets. For this  
211 aim, the previously generated binding profiles for SOC1 were used to identify  
212 shared targets with AGL16 (Immink et al. 2012; Tao et al. 2012). We applied  
213 the same annotation procedure for both AGL16 and SOC1 binding profiles in  
214 order to identify common genes. There were 193 AGL16 bound segments that  
215 overlapped with 240 SOC1 peaks (Table S4). These peaks were in the +/-2 Kb  
216 vicinity of 223 genes (five without annotation information), which were then  
217 taken as AGL16 and SOC1 common targets (Fig. 6A). Most of these common  
218 peaks were in the 1 kb region surrounding TSS with AGL16 peaks a bit more  
219 proximal (Fig. 6B). We further identified 211 CA<sub>2</sub>G-box motifs in 144 common  
220 peaks (400 bp surrounding peak centers; 74.6% of all overlapped peaks) with  
221 MEME-ChIP. Eighty-seven peaks harbored one CA<sub>2</sub>G-box  
222 (DCCAAAAWGGAAAR; 60.4%), while the rest featured two (49 or 34%) or  
223 three (6 peaks or 4.2%) or more (2 peaks; Fig. S5A). The distances between  
224 the CA<sub>2</sub>G-box motifs were significantly spaced with 20-40 bases (Fig. S5B).  
225 Among these common targets, genes involved in floral organ development (or  
226 reproductive growth) and responses to hormone stimulus including ethylene  
227 and ABA were significantly enriched (Fig. 6C; Table S4). Eight genes of the  
228 photoperiod and circadian clock related pathways (*AGL15*, *AGL18*, *ATC*,  
229 *PHYA*, *RAV2*, *SMZ*, *SNZ* and *TOE3*), three genes of the temperature-related  
230 pathways (*CBF1*, *CBF2* and *SVP*), and *SOC1* itself were involved in flowering  
231 (Fig. 3), indicating that AGL16 and SOC1 could act together to time floral  
232 transition in *Arabidopsis*.

233 **The AGL16-SOC1 module is important for genome-wide gene expression**  
234 **and flowering time regulation**

235 As AGL16 and SOC1 formed heteromeric protein complexes and as their  
236 genetic interaction played a role in the regulation of *AGL16* expression, we  
237 determined to what extent the gene expression at the genome-wide level could  
238 be affected by the AGL16-SOC1 module (Table S2). For this, we carried out a  
239 comparative transcriptomics analysis using the single and double mutants  
240 between the *agl16-1* and *soc1-2* lines. In contrast to the very broad binding  
241 spectrum of AGL16, we only detected very small number of genes showing  
242 differential expression (DEGs) in *agl16-1* single mutant (9 up and 12 down)  
243 compared to Col-0 (Fig. 7A; Table S5). The *soc1-2* single (155 up and 285  
244 down) and the *agl16 soc1* double (49 up and 353 down) mutants had similar  
245 number of DEGs but *soc1-2* featured more up and less down DEGs (Yate's  
246 *chi-square test*,  $p < 0.001$ ; Fig. 7A), indicating that AGL16 either countered  
247 SOC1's repressive role on gene expression or its inductive role. A heatmap  
248 analysis of DEGs in the *soc1-2* vs Col-0 revealed that absence of *agl16* mostly  
249 reverted the differential gene expression observed in *soc1-2* to wild type levels  
250 (Fig. 7B). Genes down-regulated in the *agl16 soc1* mutants showed also  
251 down-regulation in *soc1-2* (Fig. 7C). In contrast, genes up-regulated in *agl16*  
252 *soc1* were barely affected by either single mutation, suggesting that for these  
253 genes, AGL16 and SOC1 synergistically contribute to the repression.  
254 Accordingly, only 83 *soc1-2* DEGs (in total 155 up and 285 down; ~18.9%)  
255 overlapped with the *agl16 soc1* DEGs (375 up and 182 down; ~14.9%; Fig.  
256 7D). Therefore, AGL16 has an important potential in regulating gene  
257 expression at the genome-wide level, but apparently depends on its genetic  
258 background, here, the SOC1 activity.

259 We next examined to what extent these DEGs associated with AGL16  
260 targeting. Among the 557 *agl16 soc1* DEGs, AGL16 bound to 98 genes  
261 (~22.2%), of which only 23 (~4.1%) were also targeted by SOC1 (Fig. 7D).  
262 About 13.6% or 60 *soc1-2* DEGs were likely the AGL16 targets (Yate's  
263 *chi-square test*,  $p = 2e-8$ , in comparison to genome-wide level of AGL16  
264 binding). However, we noticed that only nine *soc1-2* DEGs (~2% among 440)  
265 were potential targets of SOC1, a pattern similar to a previous report, in which  
266 52 SOC1 targets were among the 1186 DEGs (Tao et al. 2012). There were six  
267 targets (~28.6%) showing differential expression in the 21 *agl16-1* DEGs.

---

268 Moreover, we identified more than a quarter of up-regulated DEGs specifically  
269 in the *agl16 soc1* (77 among 286) were AGL16 targets in contrast to about  
270 13.3% of up-regulated DEGs specifically in the *soc1-2* mutant (29 among 218;  
271 Yate's chi-square test,  $p=0.0035$ ; Fig. 7E). Among the 67 up-regulated DEGs  
272 shared between the *soc1-2* and *agl16 soc1* mutants, 18 (26.9%) were  
273 potentially AGL16 targets. However, only less than 8% of down-regulated  
274 DEGs in both mutants were potentially targeted by AGL16. Together, these  
275 data suggest that AGL16 may act mainly as a transcriptional repressor in the  
276 *soc1-2* background.

277 Among the DEGs between *agl16 soc1* and *soc1-2* plants, we identified 17  
278 known genes involved in flowering time regulation with seven of them (*NF-YA2*,  
279 *TCP2 1*, *RHL41*, *AGL16* and three *AP2-like* genes *RAV1*, *RAV2/TEM2*, and  
280 *SNZ*) being targeted by AGL16 (Fig. 7F; Table S5). Expression of *FT* was  
281 significantly enhanced in *agl16 soc1* double mutant. In line with this, the  
282 double mutant *agl16 soc1* flowered significantly earlier (~20 rosette leaves)  
283 than the *soc1-2* single mutant (~25.6 rosette leaves; about 21.6% reduction in  
284 rosette leaf number) but still later than both *agl16-1* (~11.1 rosette leaves;  
285 ~13.6% reduction) and wild type Col-0 (~12.9 rosette leaves) plants (Fig. 8).  
286 This indicated that *AGL16* could counteract *SOC1* effects in flowering time  
287 regulation. Thus, the regulatory role of *AGL16* in floral transition depends on  
288 *SOC1* function, similar to the genetic dependency of *AGL16* on *FLC* (Hu et al.  
289 2014). It's possible that *SOC1* repressed the inhibition of *AGL16* on *FT*  
290 expression, which should be tested further.

### 291 ***AGL16* is involved in water loss and seed germination regulation**

292 Given the very broad binding profile at the genome-wide, we continued to  
293 explore whether *AGL16* played a regulatory role in other biological process.  
294 *AGL16* binds to a large set of genes involved in abscisic acid (ABA) signaling  
295 (29), and ABA (101) and water (62) responses (Table S3). Since the function of  
296 ABA in regulating adaptation to water availability has been well established,  
297 we questioned whether *AGL16* could have a role in water governance. We

---

298 used the *agl16-1* and *m3*, a line in which the *AGL16*-specific negative regulator  
299 *miR824* was highly expressed (Hu et al. 2014; Kutter et al. 2007), to examine  
300 the water-loss-rate in the aerial parts of *Arabidopsis* plants after cutting.  
301 Compared to Col-0 control plants, six-weeks-old short-day grown mutant  
302 plants displayed a weak but significant decrease in water loss (2-4%;  
303 *Student's t-test*,  $p < 0.001$ ; Fig. 9A), suggesting that *miR824*-regulated *AGL16*  
304 could regulate the response to water deficiency. The change in water loss  
305 could be either caused by the reduction of stomata density (Kutter et al. 2007)  
306 and/or by altering the stomata aperture size, which is tightly associated with  
307 the ABA signaling pathway (Zhao et al. 2020).

308 ABA plays essential roles in seed germination and dormancy control (Bewley  
309 1997; Bentsink and Koornneef 2008). Not surprisingly, a further examination  
310 on seed dormancy levels demonstrated a significant alteration in germination  
311 rate of freshly harvested seeds of *agl16-1* and *m3* compared to the wild type,  
312 and to a reduced extent, after one-week storage (Fig. 9B). This pattern was  
313 tightly associated with increased levels of *miR824* and a decreased expression  
314 of *AGL16* in germinating seeds (Das et al. 2018). Taken together, these data  
315 suggest a regulatory role of *AGL16* in water adaptation and seed germination.  
316 Corroborating with this, *AGL16* was recently identified as a negative factor of  
317 drought resistance via regulation on stomata density and ABA accumulation  
318 (Zhao et al. 2020). *CYP707A3* (Zhao et al. 2020), *CYP707A1* and *AAO2*,  
319 which are involved in ABA biosynthesis and metabolism, were among the  
320 *AGL16* targets (Table S3). Since ABA related signaling genes were also  
321 enriched in *AGL16*-SOC1 common targets (Fig. 6C), it would be worth to  
322 examine further the regulatory function of the *AGL16*-SOC1 module in water  
323 loss and seed dormancy processes.

324

---

## 325 Discussion

326 In this study, via ChIP-seq and transcriptomic profiling as well as genetic  
327 analyses, we show that AGL16 targets to a broad range of genes and acts in a  
328 wide range of biological processes such as water deprivation and seed  
329 germination time. Depending on SOC1 function, AGL16 occupies important  
330 hubs in the GRNs involved in flowering time regulation.

### 331 **AGL16 interacts with SOC1 and times flowering with a partial** 332 **background dependency on SOC1**

333 AGL16 is known as a floral repressor in photoperiod pathway of flowering time  
334 regulation (Hu et al. 2014). Corroborating with previous notions (de Folter et al.  
335 2005; Immink et al. 2012; Immink et al. 2009), AGL16 forms heteromeric  
336 protein complexes with SOC1, as evidenced by our Y2H and BiFC analyses  
337 (Fig. 5). This suggests that both proteins work together to target a common set  
338 of downstream genes. We provide evidences that AGL16 binds potentially  
339 more than 2000 target genes (Fig. 2), many of which are share with SOC1  
340 (~50% of SOC1 bound genes; Fig. 6). Since AGL16 forms also protein  
341 complexes with SVP and FLC (Hu et al. 2014) and potentially with SEP3 (Fig.  
342 S3) (de Folter et al. 2005), it would be worth to examine whether AGL16  
343 shares also common targets with these TFs. As *AGL16* times flowering time  
344 with a genetic background dependency on *SOC1*, similar to our previous  
345 finding on *AGL16*'s dependency on *FLC* activity (Hu et al. 2014), whether  
346 *SOC1* and *FLC* work together to mediate the *AGL16*'s function in flowering  
347 time regulation awaits further investigation.

348 *AGL16* might exert its regulation potential in several pathways controlling  
349 flowering time (Fig. 3). Being congruent with its photoperiod dependency in  
350 regulation of flowering time, *AGL16* targets 37 genes (including *AGL16* itself)  
351 related to photoperiod and circadian clock pathways. Under the tested  
352 environmental conditions *agl16-1* still shows a normal vernalization response  
353 (Hu et al. 2014), several genes related to temperature responses are directly

354 targeted by AGL16. FLC, SVP and SOC1 might be partners of AGL16 in this  
355 respect as all three proteins target also directly on some of these  
356 temperature-related genes (Deng et al. 2011; Mateos et al. 2015; Immink et al.  
357 2012; Tao et al. 2012). The binding of AGL16 may cause both positive and  
358 negative influences on the transcription of these targets (Fig. 7), which  
359 encompass both repressors and promoters of the floral transition. Indeed,  
360 several of the flowering time genes targeted by AGL16 show an enhanced or  
361 decreased expression when *AGL16* activity is modified in the *soc1-2*  
362 background (Fig. 3 and 7; Table S4, S5). Therefore, the early flowering  
363 phenotypes present in *AGL16* loss-of-function mutants (Fig. 8) (Hu et al. 2014)  
364 might be a net-effect/balance of the regulation on different pathways.

### 365 ***AGL16-SOC1* module acts in regulating genome-wide gene expression**

366 MADS-box TFs often act together to target and regulate the expression of a  
367 broad set of downstream genes (de Folter et al. 2005; Deng et al. 2011;  
368 Immink et al. 2009; Immink et al. 2012; Kaufmann et al. 2009; Kaufmann et al.  
369 2010; Lee et al. 2008; Mateos et al. 2015; Tao et al. 2012). Although AGL16  
370 binds more than 2000 genes, which is in line with its very broad expression in  
371 many tissues and organs (Alvarez-Buylla et al. 2000), AGL16 alone can only  
372 affect the expression of a limited number of genes in the background of Col-0,  
373 in which *SOC1* is functional (Fig. 7). However, when *SOC1* is non-functional  
374 (in *soc1-2* background), AGL16 modulates the expression of more than 550  
375 genes and acts both as a transcriptional repressor and activator. Moreover, in  
376 the *soc1-2* background, AGL16 seems mainly act as a transcriptional  
377 repressor as more than a quarter of the up-regulated DEGs, in contrast to the  
378 less than 8.5% of the down-regulated DEGs, are potential targets of AGL16.  
379 Hence AGL16's activity in gene expression regulation requires partially the  
380 participation of SOC1. On the other hand, SOC1 also needs partially the  
381 *AGL16* function as SOC1's repressive activity significantly drops (from 155 to  
382 49 genes) but the promoting activity significantly increases (from 285 to 353  
383 genes) when *AGL16* has no function. Many *soc1-2* DEGs are not differentially  
384 expressed any more in *agl16 soc1* mutant (Fig. 7). Therefore, AGL16 and  
385 SOC1 act both additively and synergistically in regulation of genome-wide

386 gene expression.

### 387 **AGL16 is important in GRNs connecting life-history traits**

388 Both AGL16 and SOC1 can directly bind to chromatin and regulate the  
389 expression of genes involved in hormone signaling and abiotic stresses (Fig. 6)  
390 (Immink et al. 2012; Tao et al. 2012). Corroborating with this, alteration in  
391 *AGL16* activity significantly changes the water loss efficiency, a process for  
392 which stomata development (Kutter et al. 2007) and ABA signaling might play  
393 a role (Zhao et al. 2020). Previously, SOC1 has been implicated in modulating  
394 stomata opening (Kimura et al. 2015). AGL16 also participates in the  
395 regulation of seed germination (Fig. 9), a key step in plant life cycle and  
396 adaptation to fluctuating environmental conditions (Koornneef, Bentsink, and  
397 Hilhorst 2002; Bewley 1997). The expression of *miR824*-regulated *AGL16*  
398 decreases significantly during seed germination (Das et al. 2018). The  
399 regulatory role of AGL16 in seed germination might be related to ABA as many  
400 ABA signaling genes including those encoding for ABA receptors, such as  
401 *PYL4*, *PYL5*, *PYL8*, are directly targeted by AGL16 (Table S3). *PYL8* is  
402 co-bound by SOC1 (Table S4). Therefore, the *miR824-AGL16* module seems  
403 to be important in GRNs connecting the two key transitional events, i.e.,  
404 flowering and germination.

405 In summary, our data reveals that, as a master regulator in GRNs connecting  
406 multiple biological pathways, AGL16's function depends partially on *SOC1*,  
407 similar to the genetic dependency on *FLC* (Hu et al. 2014). AGL16 might act as  
408 a glue, like other MADS-box TFs do, to modulate the chromatin accessibility of  
409 their interacting proteins to micro-tune the expression of downstream genes at  
410 proper stages and environmental conditions (Pajoro et al. 2014; Immink et al.  
411 2009; Kaufmann et al. 2010; Richter et al. 2019). It will be important to address  
412 this further to understand their precise roles and mechanisms in balancing  
413 development and adaptation.

### 414 **Materials and methods**

## 415 **Plant materials, and growth conditions**

416 *A. thaliana* plants including wild-type Col-0, *agl16-1*, *35S:AGL16-YFP-HA* in  
417 *agl16-1* background, Col-*FRI*, *agl16-1* Col-*FRI*, and *m3* have been described  
418 previously (Kutter et al. 2007; Hu et al. 2014). The *soc1-2* mutant in Col-0  
419 background (Torti et al. 2012) was kindly provided by Prof. George Coupland.  
420 To test the genetic interactions between *AGL16* and *SOC1*, *agl16-1* and  
421 *soc1-2* were crossed and double mutant was screened with gene-specific  
422 primers (Table S1) (Torti et al. 2012; Kutter et al. 2007; Hu et al. 2014).

423 *Arabidopsis* seeds were stratified in distilled water at 4°C for 72 h and sown in  
424 soil and grown under LD conditions (16-h light at 21°C and 8-h night at 18°C).  
425 Seedlings for phenotyping were planted either in growth rooms or chambers,  
426 while materials for gene expression analysis and ChIP assays were sown on  
427 Murashige and Skoog medium plates (Hu et al. 2014).

## 428 **RNA Isolation, real-Time RT-qPCR, and RNA-seq assays**

429 Total RNA was extracted with TRI Reagent<sup>®</sup> (Molecular Research Center, Inc.  
430 Cincinnati, USA). Ten days old seedlings were used for quantification of relative  
431 expression of selected genes with *PP2A* as reference (Hu et al. 2014).  
432 Reverse transcription was carried out with the HiScript<sup>®</sup> II Q RT SuperMix for  
433 qPCR (+gDNA wiper) and quantification PCRs were performed with ChamQ<sup>™</sup>  
434 SYBR qPCR Master Mix (both from Vazyme Biotech co. Ltd, Nanjing) on  
435 QuantStudio<sup>™</sup> 7 Flex Real-Time PCR System (ThermoFisher). Three to four  
436 biological replicates from each of two to three independent trials were applied  
437 for each experiment. A similar protocol was developed for monitoring relative  
438 enrichment of DNA fragments in ChIP-qPCR experiments. All the primers used  
439 in this study are included in Table S1.

440 For RNA-seq, materials were collected from three independent biological  
441 replicates for each genotype, and DNA-free total RNA was generated as  
442 described above. Illumina True-seq library preparation was performed from 3



---

443  $\mu$ g DNA-free total RNA and sequenced by the Biomarker Technologies  
444 Corporation, Beijing, China. Quality trimmed pair-end RNA-seq reads were  
445 mapped to the Arabidopsis TAIR10 annotation using the *HISAT2* v2.1.0 (Kim  
446 et al. 2019). The *featureCounts* included in *subread* v1.6.4 package was  
447 applied to calculate reads counts on each gene (Liao, Smyth, and Shi 2013;  
448 Liao, Smyth, and Shi 2014). *DESeq2* v1.14.1 was used to detect differentially  
449 expressed genes (DEGs; fold change above 1.5 and  $p_{adj} < 0.1$ ). Only uniquely  
450 mapped reads were used for downstream analysis. Transcriptional clustering  
451 analysis was performed using the *heatmap.2* function in *R*. GO analysis was  
452 performed with *PANTHER* in TAIR web-tool  
453 ([https://www.arabidopsis.org/tools/go\\_term\\_enrichment.jsp](https://www.arabidopsis.org/tools/go_term_enrichment.jsp)) (Mi et al. 2017) or  
454 *agriGO* pipeline (Tian et al. 2017).

#### 455 **ChIP-seq and ChIP-qPCR assays and data analysis**

456 ChIP experiments were carried out following protocols described (Zhou et al.  
457 2016; Reimer and Turck 2010). Chromatin for both *agl16-1* and *agl16-1*  
458 *AGL16OX* plants was extracted from ten-day-old seedlings grown under LD  
459 conditions at ZT14, and precipitated with antibody against GFP (Abcam,  
460 Ab290). For ChIP-seq, the immuno-precipitations from two independent trials  
461 were used for NGS library preparation with NEBNext<sup>®</sup> Ultra<sup>™</sup> II DNA Library  
462 Prep Kit for Illumina<sup>®</sup> (E7645, New England BioLabs Inc.) and high-throughput  
463 sequencing with HiSeq2000 platform. ChIP-seq reads were mapped to the  
464 TAIR10 assembly of *A. thaliana* using *BWA-MEM* (v0.7.17-r1188) (Li 2013).  
465 Reads with mapping quality below 30 were discarded with *SAMtools* v1.7 (Li et  
466 al. 2009). Duplicated reads were removed using *Picard MarkDuplicates* v1.119.  
467 The resulted *.bam* file was used as input to call AGL16 enriched regions with  
468 *MACS v2.2.7.1* (Zhang et al. 2008). Enriched regions were generated by the  
469 comparison of immune-precipitated products to input for *AGL16OX* and then  
470 compared against *agl16-1*. For annotation of AGL16 targets, the *R* package  
471 *ChIPseeker* was used (Yu, Wang, and He 2015). The position and strand  
472 information of nearest genes were reported with the distance from peak to the

---

473 TSS of its closest gene identified. As annotations might overlap, we use  
474 'promoter' definition in *ChIPseeker* as the highest priority for annotation. Each  
475 binding site was assigned to only one gene. IGV was used for data  
476 visualization of the binding profiles for targets (Thorvaldsdottir, Robinson, and  
477 Mesirov 2013). Enriched motifs in AGL16 binding peaks were identified using  
478 *Homer* suite with *findMotifsGenome.pl* function (Heinz et al. 2010). Motifs in  
479 AGL16-SOC1 co-targeted regions were analyzed with *MEME-ChIP* tools  
480 (Machanick and Bailey 2011), and the spacing between primary and  
481 secondary motifs was analyzed with *SpaMo* (*spamo -dumpseqs -bin 20*  
482 *-verbosity 1 -oc spamo\_out\_1 -bgfile./background -keepprimary -primary*  
483 *DCCAAAAAWGGAAAR*). We compared the AGL16 targets to SOC1 targets  
484 from both Immink (2012) and Tao (2012) with the same annotation procedures  
485 for AGL16 (Immink et al. 2012; Tao et al. 2012). In an earlier independent trial,  
486 we pooled the immune-precipitations from two biological replicates and  
487 sequenced the products. This pooled sequencing results gave similar pattern  
488 of AGL16 targets profile but with a lower coverage hence the data was not  
489 shown. *Yate's chi-square tests* were performed online  
490 (<http://www.quantpsy.org/chisq/chisq.htm>). The ~400 flowering time genes  
491 were downloaded from <https://www.mpipz.mpg.de> (Bouche et al. 2016) with  
492 self-curations. Reads data for RNA-seq and ChIP-seq experiments were  
493 accessible at NCBI under accession code SUB5067038.

#### 494 **Phenotype assays**

495 Flowering time assays were carried out according to previous report (Hu et al.  
496 2014). Four independent trials were applied and each gave similar pattern.  
497 Phenotype comparisons were performed with Student's *t-test* with  
498 *Bonferroni-correction*.

499 For water-loss assays, rosette leaves of six week-old plants grown under short  
500 day conditions were used for measurements of water-loss rates (Lefebvre et al.  
501 2006). Fresh rosettes were cut at their base and immediately weighted to  
502 establish initial fresh weight (FW<sub>i</sub>). These rosettes were left in open air at room

---

503 temperature in the lab and weighted 1, 2, 3, and 4 hrs after cut to calculate  
504 weight loss per unit of time, ( $FW_t - FW_i$ ). At each time point, the amount of water  
505 lost was quantified by expressing the lost weight per unit of time as a  
506 percentage of  $FW_i$ . To quantify the role of the *miR824/AGL16* regulatory  
507 system in the rate of water loss, average water loss of the mutants was  
508 expressed as percentage of the average water loss measured in Col-0. This  
509 experiment was repeated two times and both gave similar pattern.

510 For seed dormancy assays, about 50 individually- and freshly- harvested  
511 seeds were plated onto a filter paper moistened with demineralized water in  
512 Petri dishes and incubated in LD conditions in transparent moisturized  
513 containers (16h light/8h dark, 25°C/20°C cycle) (Xiang et al. 2014).  
514 Germination was scored after 7 days of incubation. For each assay, at least  
515 three trials, each with minimum 10 individual plants, were used.

## 516 **Yeast two-hybrid and biomolecular fluorescence complementation (BiFC)** 517 **experiments**

518 Yeast two-hybrid and the BiFC assays were carried out to test the physical  
519 interaction between AGL16 and SOC1 proteins according to previous report  
520 (Hu et al. 2014). In yeast two-hybrid assay, interactions between AGL16-SVP  
521 and AGL16-AGL16 were applied as positive controls while the AGL16-LHP1,  
522 AGL16-BD, SOC1-BD, AD-AGL16, and AD-SOC1 were applied as negative  
523 controls together with empty vectors. For BiFC assay in *Nicotiana*  
524 *benthamiana* plants, *35S::SOC1-cYFP* construct was built by cloning the  
525 full-length encoding-region without stop codon of *SOC1* (from Col-0) into  
526 *pDONR221* entry vector first and later transferred into *RfA-sYFPc-pBatTL-B*  
527 vector. The interactions between AGL16 and SVP, between AGL16 and LHP1,  
528 were used as positive and negative controls, respectively.

## 529 **Acknowledgements**

530 We thank Liangyu Liu, Feihong Yan, Fei He, Yibo Sun, Shulan Chen for

531 assistance in experiments. This work was supported by grants from National  
532 Natural Science Foundation of China (31570311 to J-Y H, 31501034 to X D,  
533 31700275 to Y-X D, 31800261 to F C), from the CAS Pioneer Hundred Talents  
534 Program (292015312D11035 to J-Y H), and CAS Key Laboratory for Plant  
535 Diversity and Biogeography of East Asia to J-Y H, from the China Postdoctoral  
536 Science Foundation (2017M613023 to Y-X D), the Postdoctoral targeted  
537 funding from Yunnan Province to F C and Y-Y D, and the Yunnan basic and  
538 applied research funding to F C. This work is partially facilitated by the  
539 Germplasm Bank of Wild Species of China. The authors declare no conflict of  
540 interest.

## 541 **Author Contributions**

542 J-Y H conceptualized and coordinated the research; L-P Z performed the ChIP  
543 experiments and collected the RNA samples, D-M Y and Y Z carried out the  
544 protein interaction assays, X D, J-Y H and L-P Z created the genetic materials  
545 and did the genetic analyses, X D analyzed and visualized the data, F C, Y-X D,  
546 X-D J, F-M Q and F T did other analyses; J-Y H wrote the paper with help from  
547 F T and the other authors. All authors had read and approved the manuscript.

548

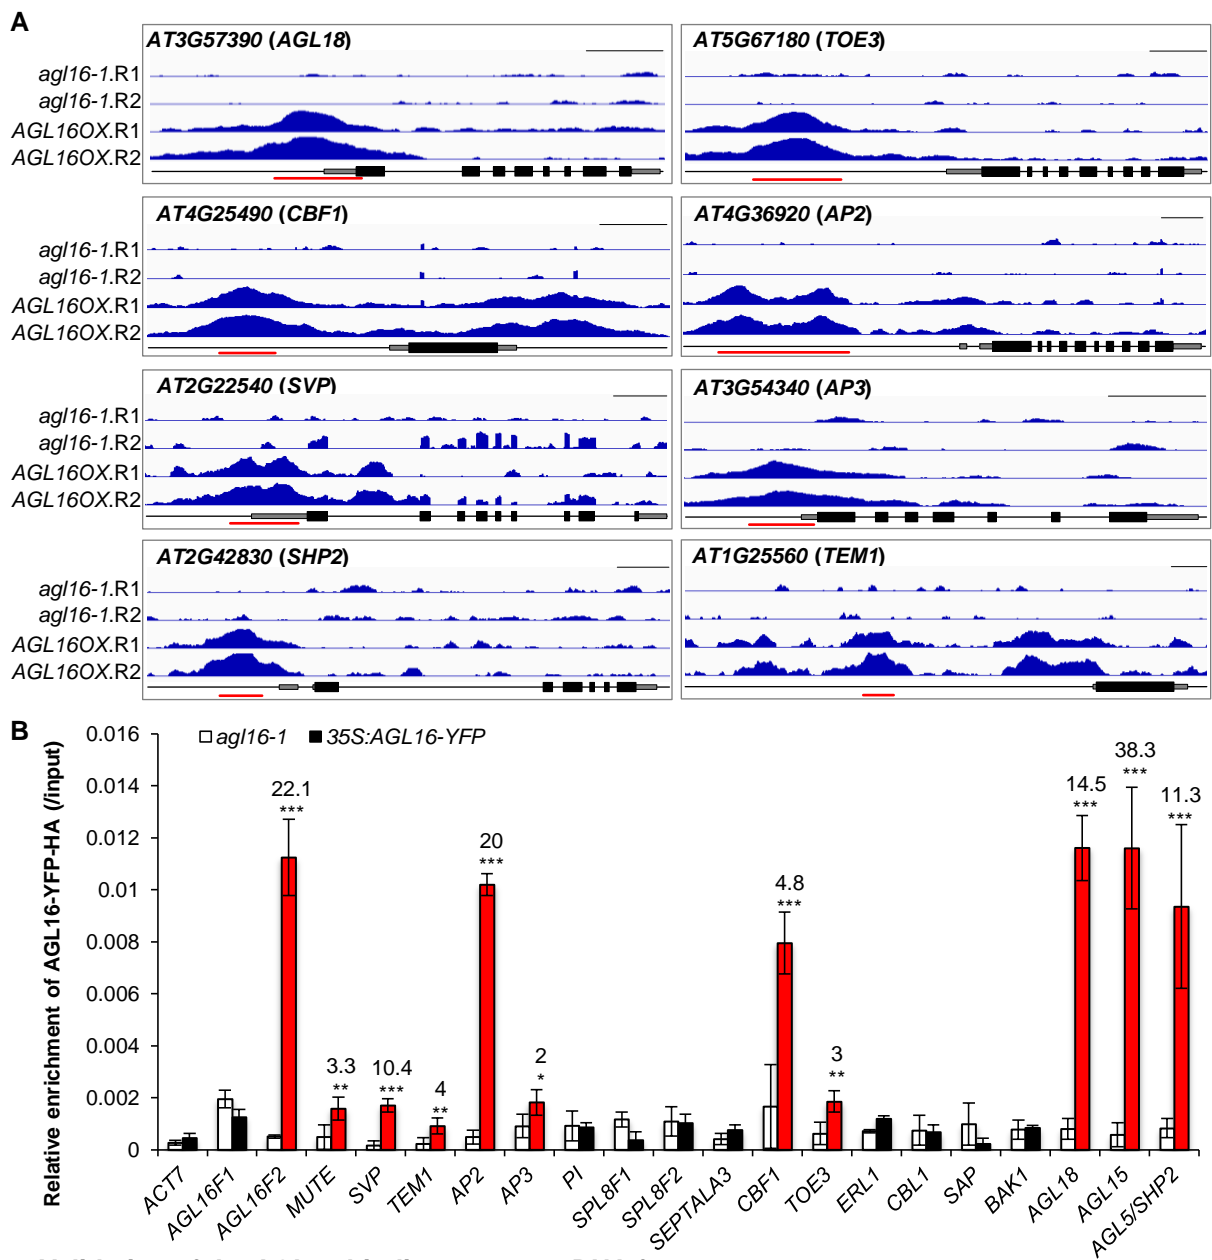

**Fig. 1 Validation of the AGL16 binding on target DNA fragments.**

**A.** Binding profiles for selected target genes. The TAIR10 annotation of the genomic locus was shown at the bottom of each box. For each panel, the profiles for two trials (R1 and R2) in *agl16-1* background line were shown in the upper panel, while the profiles for *agl16-1* 35S:AGL16-YFP-HA (AGL16OX; two trials) were shown in the middle panel of each box. All the genes were from 5'-end to 3'-end with scale bars indicating sequence lengths of 500 bp. Note that data range for each gene in *agl16-1* and AGL16OX was the same scale, but different genes could have different scale. Red lines marked the binding regions tested via CHIP-qPCR assays (B).

**B.** CHIP-qPCR validation of AGL16 binding on 20 DNA segments. Significant enrichment (red bars) was defined with the following criteria: mean enrichment must be at least two-fold higher than negative control *ACT7*, the enrichment for AGL16OX (in *agl16-1* background) than *agl16-1* must be higher than two-fold change, and the amplification  $C_T$  number of IP samples must be at least 2 cycles less than no-antibody controls. This experiment was repeated with another independent trial, in which the relative enrichment of AGL16F1 and SAP did not meet above criteria (see Figure S4). Statistics was carried out with *Student's t-test* with Bonferroni correction. \*\*\*,  $P < 0.001$ ; \*\*,  $p < 0.01$ ; \*,  $p < 0.05$ .

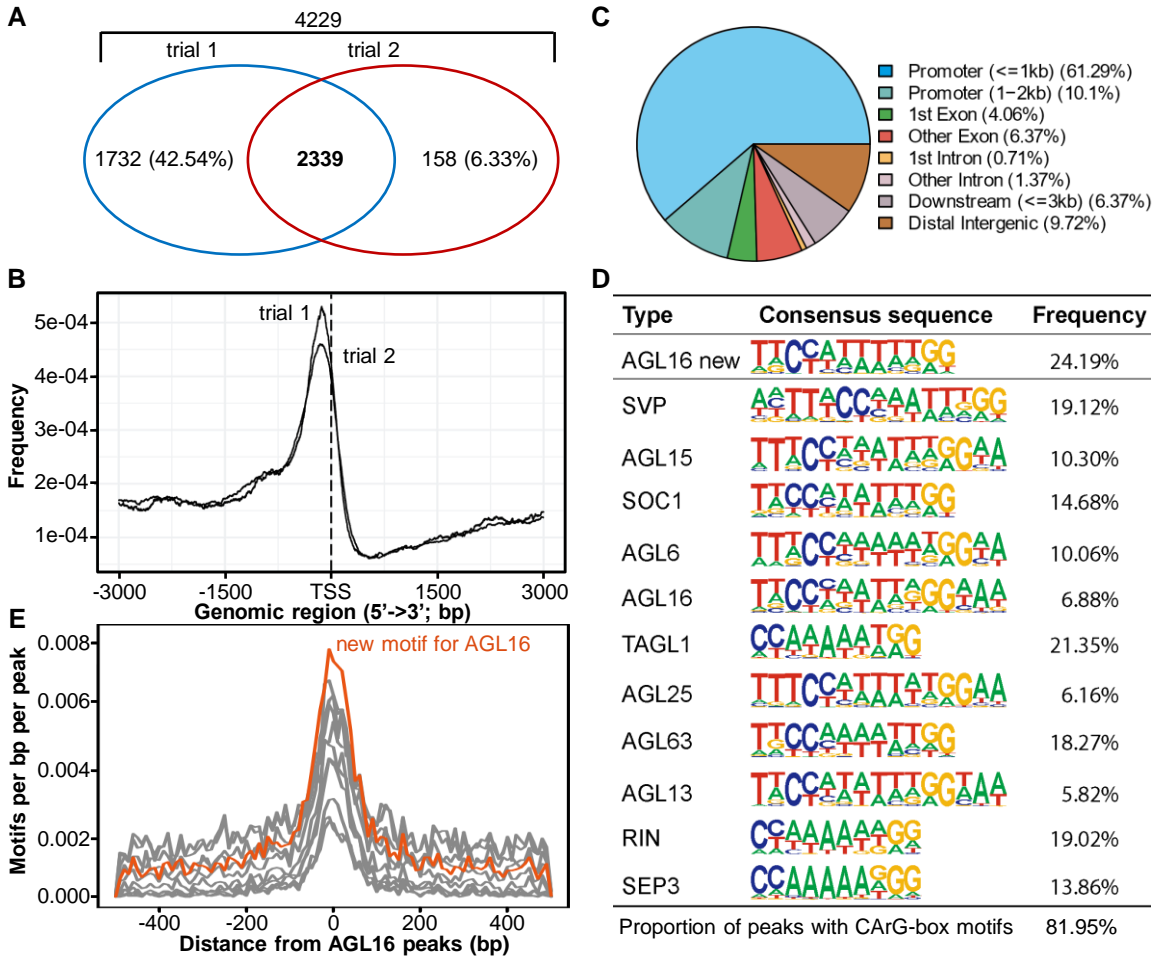

**Fig. 2 Genome-wide identification of AGL16 target genes via ChIP-seq.**

**A.** Venn diagram of AGL16 targets identified in two independent trials.

**B.** Distribution of AGL16 binding sites for two trials surrounding the transcriptional starting site (TSS).

**C.** Location distribution in relative to nearby genes for AGL16 binding sites of trial 1. Peaks within the 3 Kb promoter region were taken as AGL16 targets.

**D.** CARG type of motifs over-represented in the AGL16 binding peaks. AGL16 new, which was highly similar to known SOC1 type, showed the *de novo* motif predicted for AGL16. Frequency gave the percentage for each motif presented in the binding peaks.

**E.** Distribution of new (orange) and known (gray; shown in **D**) CARG type of motifs around AGL16 peaks center.

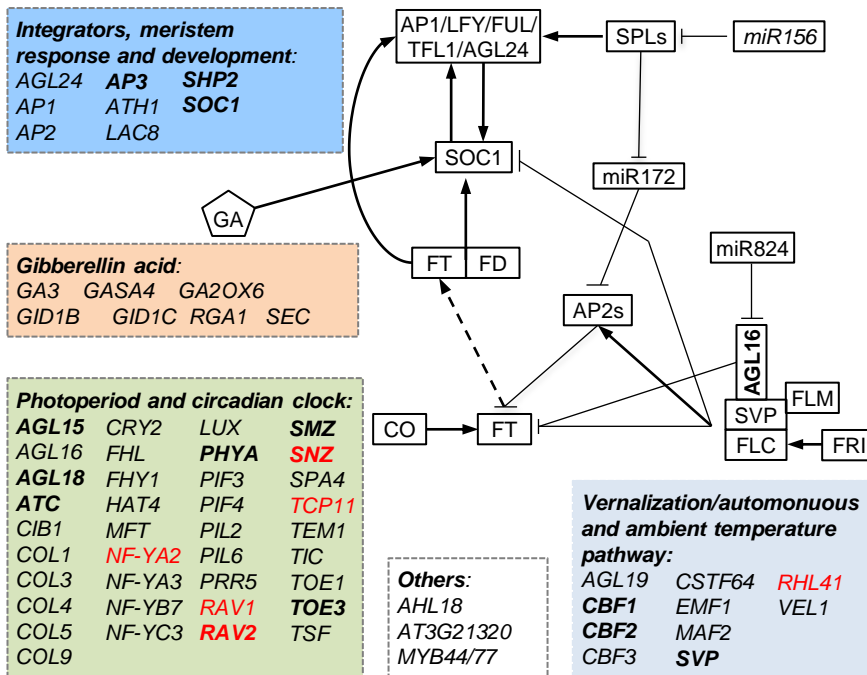

**Fig. 3 Molecular pathways (indicated with different color boxes) targeted by AGL16.** Genes with names in bold were common targets for AGL16 and SOC1, while those in red were differentially expressed between the *agl16 soc1* and *soc1-2* mutants.

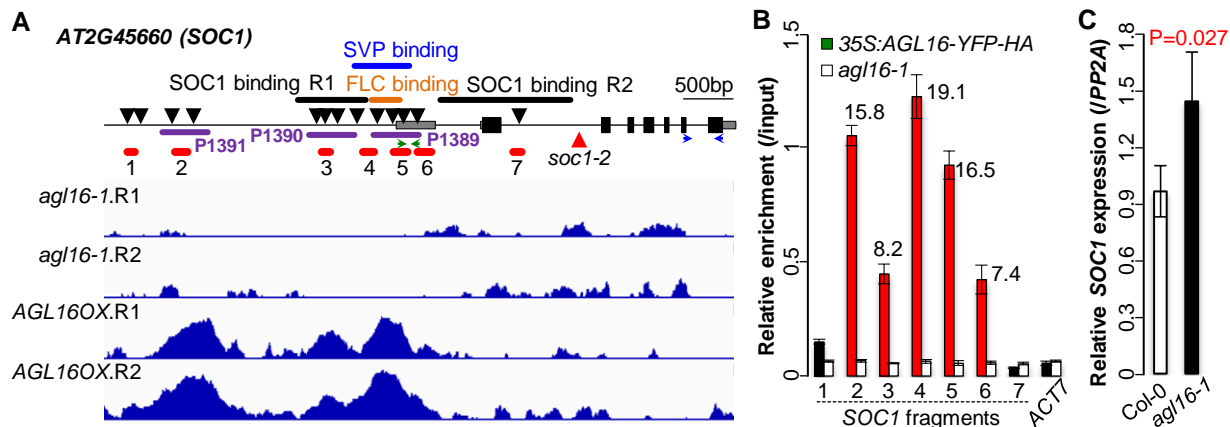

**Fig. 4 AGL16 targets and regulates *SOC1*.**

**A.** Schematic representation of the *SOC1* locus. Filled bars indicated exons and gray bars marked the 5'- and 3'-UTR regions while the line indicated the non-coding region of *SOC1*. Arrows downward labelled the putative CARG-boxes potentially bound by MADS-box proteins. The dark purple lines indicated the three peaks (P1389, P1390 and P1391) bound by AGL16. Orange, blue and black thick lines marked the known regions targeted by FLC, SVP and SOC1, respectively. Note that two sites in the regulatory region of *SOC1* were bound by itself (SOC1 binding R1 and R2; see ref. Tao et al. 2012). Red lines (1 to 7) showed the regions tested for AGL16-YFP-HA binding on *SOC1* chromatin. Horizontal arrows marked the position of primers used for quantification of 5'-UTR (green) and CDS (blue) regions. The lower panel showed the ChIP-seq profile at *SOC1*.

**B.** Relative enrichment of AGL16 on *SOC1* chromatin tested with ChIP-qPCR. Fold change values with significant enrichment was labelled above bars. *ACT7* was taken as a negative enrichment control.

**C.** Relative expression of *SOC1* CDS against *PP2A* in Col-0 and *agl16-1* plants.



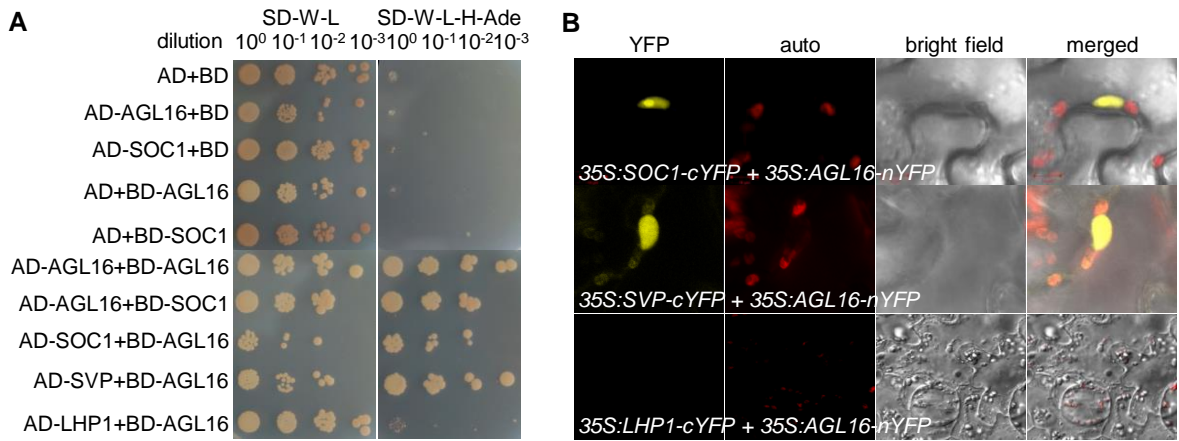

**Fig. 5 AGL16 forms protein complex with SOC1.**

**A.** Yeast two-hybrid assay revealed a direct interaction between AGL16 and SOC1. Each protein was fused to either the activation domain (AD) as prey or the DNA-binding domain (BD) as bait. Serial dilutions ( $10^0$  x to  $10^{-3}$  x) of J69-4A cells containing different construct combinations indicated on the left were grown on control (left) and selective (right) medium. The AGL16-SVP and the AGL16-LHP1/empty vector combinations provided positive and negative controls, respectively. Note the formation of a AGL16 homodimer.

**B.** BiFC assay evidenced the formation of AGL16-SOC1 complex in nucleus of *Nicotiana benthamiana* leaf epidermis. The interaction was tested with constructs *35S:SOC1-cYFP* and *35S:AGL16-nYFP*. A negative interaction between AGL16 and LHP1 and a positive interaction between AGL16 and SVP were tested as well (see also Hu et al. 2014).

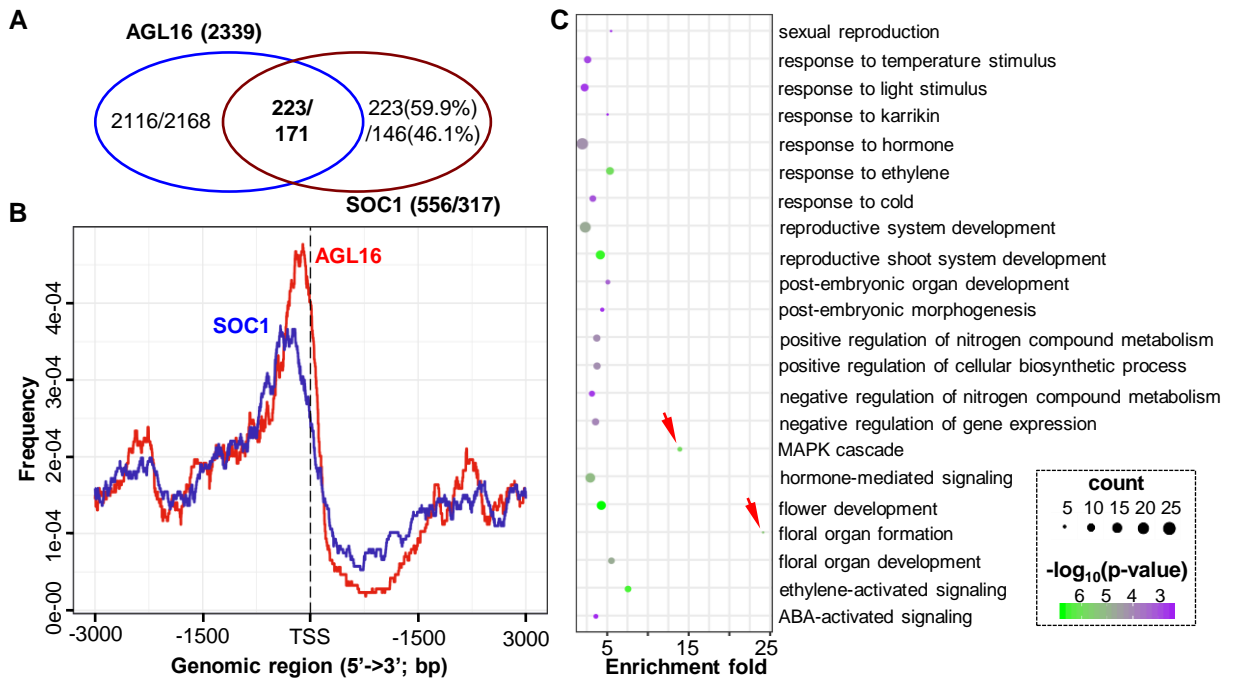

**Fig. 6 AGL16 and SOC1 share a common set of target genes involved in multiple functions.**

**A.** Venn diagram showing that 223/171 genes (Immink et al. 2012 / Tao et al. 2012) were co-bound potentially by both AGL16 and SOC1.

**B.** Binding intensities for AGL16 (red) and SOC1 (blue) peaks surrounding transcription starting sites (TSS). Regions 3kb upstream and downstream of TSS were plotted.

**C.** Selected significantly-enriched GO terms for the common targets. Note the GO terms marked by red arrowheads.

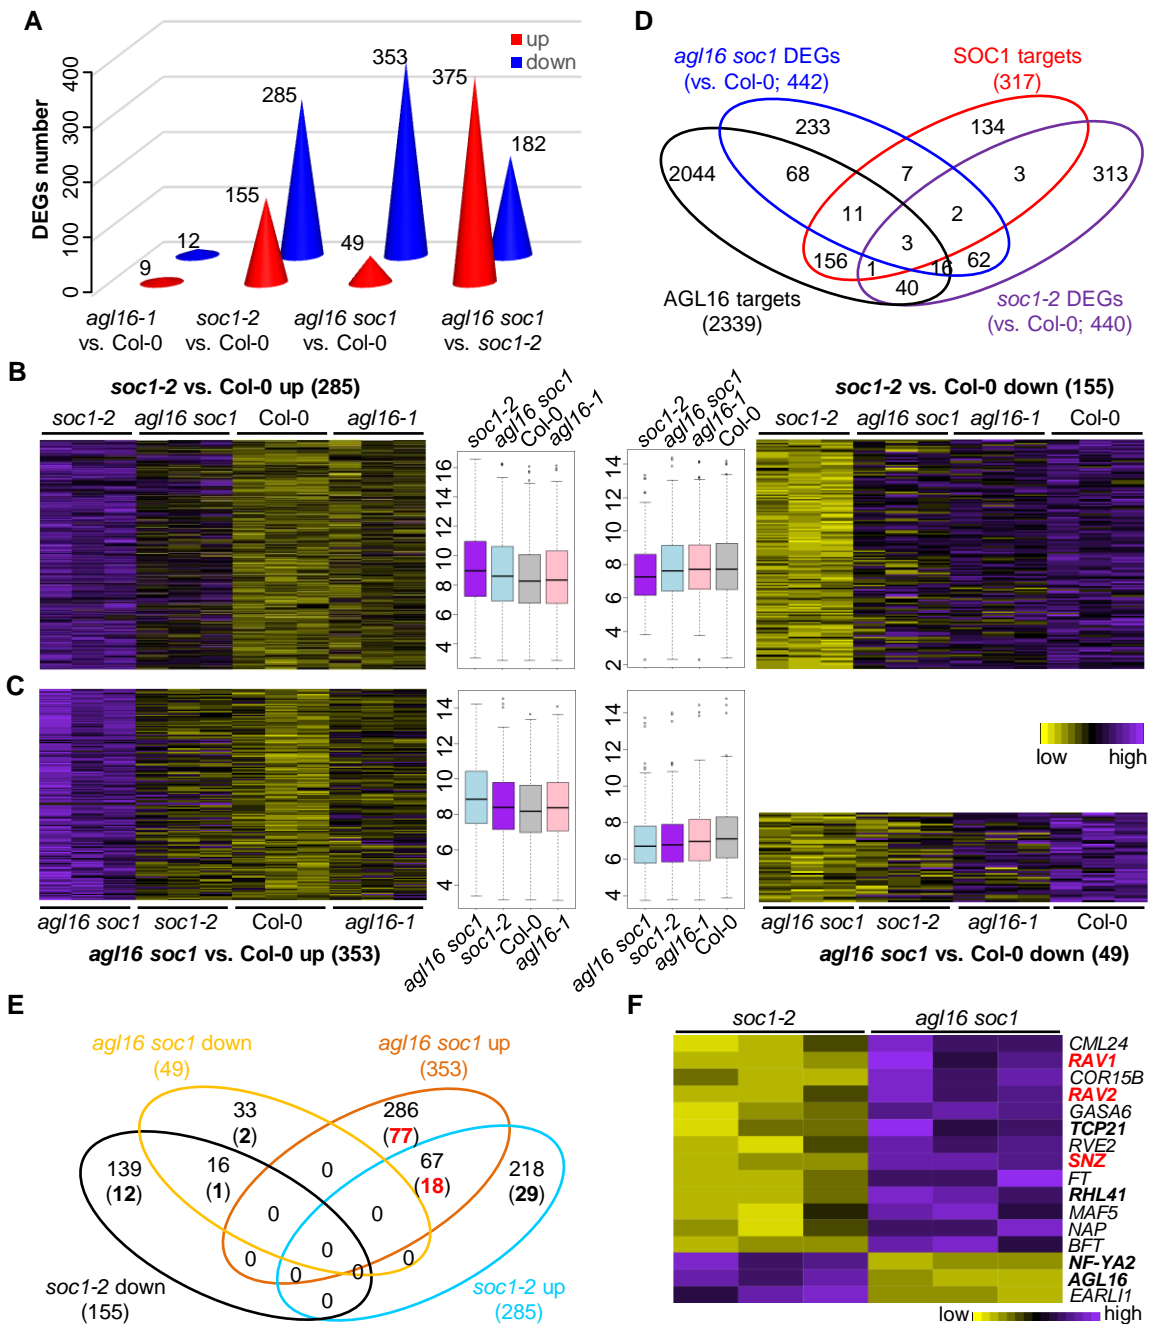

**Fig. 7 The AGL16-SOC1 module collaborates on regulation of genome-wide gene expression.**

**A.** The number of differentially expressed genes (DEGs) in three mutants. The exact number of up (red) or down (blue) regulated DEGs were given on each cone.

**B and C.** Heatmaps showing the normalized relative expression of *soc1-2* (**B**) and *agl16 soc1* (**C**) DEGs in all four lines. The boxplots in the middle gave the data distribution pattern for each cluster.

**D.** Venn diagram demonstrating the overlap between DEGs and the AGL16 targets profile.

**E.** A detailed comparison between the DEGs in *soc1-2* and *agl16 soc1* mutants with the AGL16 binding profile. Bold numbers in brackets showed the number of DEGs bound by AGL16.

**F.** A heatmap showing the normalized relative expression of the DEGs related to flowering time regulation in the *soc1-2* and *agl16 soc1* mutants.

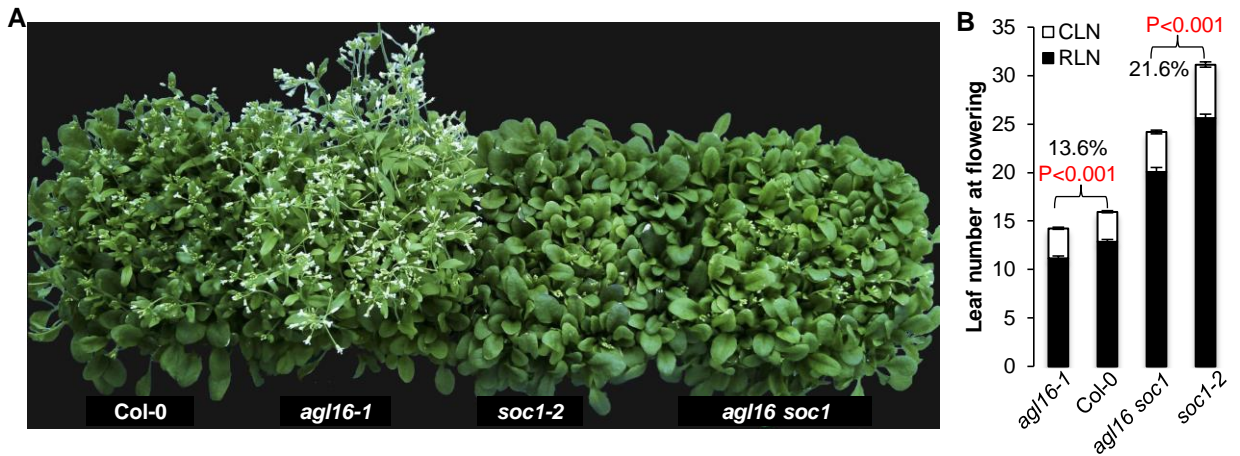

**Fig. 8 AGL16 and SOC1 regulate additively flowering time.**

**A.** Flowering behaviors of LD-growing wild type Col-0, *agl16-1*, *soc1-2* and *agl16 soc1* mutants.

**B.** Leaf number production upon flowering under LD conditions. Rosette (filled bars, RLN) and cauline (open bars, CLN) leaves were shown. Numbers in percentage showed the earlier flowering level of *agl16-1* and *agl16 soc1* comparing to Col-0 and *soc1-2*, respectively. Analyses were repeated three times and all had similar patterns.

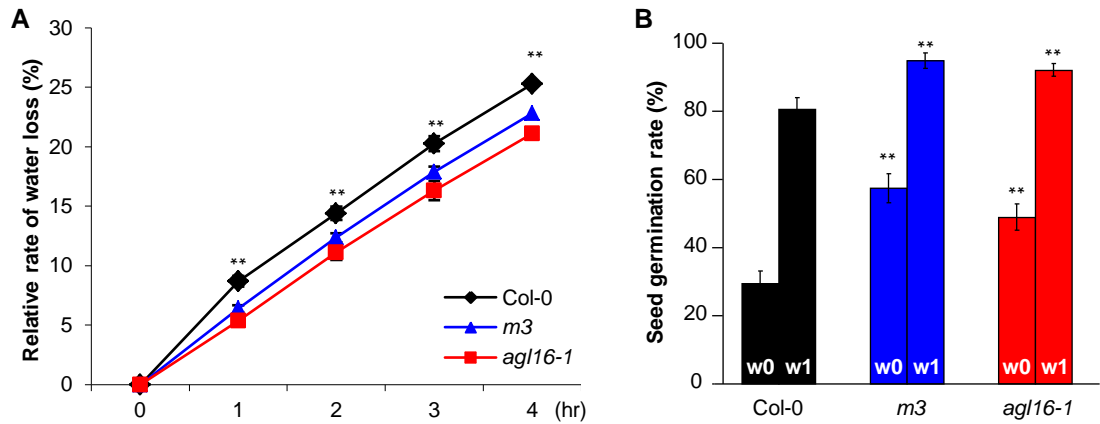

**Fig. 9 *miR824-AGL16* regulates water loss rate and seed dormancy.**

**A.** Relative rates of water loss for *agl16-1* and *m3*. Six weeks old rosettes growing under SD conditions were cut and the decreases of fresh weight in percentage were measured.

**B.** Changes in seed germination behavior of *agl16-1* and *m3* lines in contrast to Col-0. Bars mark the germination proportion in percentage at the time point of freshly harvesting (w0) and one week after (w1).

In **A** and **B**, mean values for at least ten individuals with standard deviation were shown. The experiments were replicated for at least twice with similar patterns. Significance was tested against Col-0 with *Student's t-test*, \*\*  $p < 0.01$ .

## Parsed Citations

- Aerts, Niels, Suzanne de Bruijn, Hilda van Mourik, Gerco C. Angenent, and Aalt D. J. van Dijk. 2018. 'Comparative analysis of binding patterns of MADS-domain proteins in *Arabidopsis thaliana*', *BMC Plant Biology*, 18: 131.  
Google Scholar: [Author Only](#) [Title Only](#) [Author and Title](#)
- Alvarez-Buylla, E. R., S. J. Liljegren, S. Pelaz, S. E. Gold, C. Burgeff, G. S. Ditta, F. Vergara-Silva, and M. F. Yanofsky. 2000. 'MADS-box gene evolution beyond flowers: expression in pollen, endosperm, guard cells, roots and trichomes', *Plant J*, 24: 457-66.  
Google Scholar: [Author Only](#) [Title Only](#) [Author and Title](#)
- Andres, Fernando, and George Coupland. 2012. 'The genetic basis of flowering responses to seasonal cues', *Nat Rev Genet*, 13: 627-39.  
Google Scholar: [Author Only](#) [Title Only](#) [Author and Title](#)
- Aukerman, M. J., and H. Sakai. 2003. 'Regulation of flowering time and floral organ identity by a MicroRNA and its APETALA2-like target genes', *Plant Cell*, 15: 2730-41.  
Google Scholar: [Author Only](#) [Title Only](#) [Author and Title](#)
- Bao, Shengjie, Changmei Hua, Gengqing Huang, Peng Cheng, Ximing Gong, Lisha Shen, and Hao Yu. 2019. 'Molecular Basis of Natural Variation in Photoperiodic Flowering Responses', *Developmental Cell*, 50: 90-101.e3.  
Google Scholar: [Author Only](#) [Title Only](#) [Author and Title](#)
- Bentsink, Leónie, and Maarten Koornneef. 2008. 'Seed Dormancy and Germination', *The Arabidopsis Book*: e0119.  
Google Scholar: [Author Only](#) [Title Only](#) [Author and Title](#)
- Bewley, J. D. 1997. 'Seed Germination and Dormancy', *Plant Cell*, 9: 1055-66.  
Google Scholar: [Author Only](#) [Title Only](#) [Author and Title](#)
- Bouche, Frederic, Guillaume Lobet, Pierre Tocquin, and Claire Perilleux. 2016. 'FLOR-ID: an interactive database of flowering-time gene networks in *Arabidopsis thaliana*', *Nucleic Acids Research*, 44: D1167-D71.  
Google Scholar: [Author Only](#) [Title Only](#) [Author and Title](#)
- Boxall, Susanna F., Jonathan M. Foster, Hans J. Bohnert, John C. Cushman, Hugh G. Nimmo, and James Hartwell. 2005. 'Conservation and Divergence of Circadian Clock Operation in a Stress-Inducible Crassulacean Acid Metabolism Species Reveals Clock Compensation against Stress', *Plant physiology*, 137: 969-82.  
Google Scholar: [Author Only](#) [Title Only](#) [Author and Title](#)
- Castillejo, C., and S. Pelaz. 2008. 'The balance between CONSTANS and TEMPRANILLO activities determines FT expression to trigger flowering', *Curr Biol*, 18: 1338-43.  
Google Scholar: [Author Only](#) [Title Only](#) [Author and Title](#)
- Das, S. S., S. Yadav, A Singh, V. Gautam, A K. Sarkar, A. K. Nandi, P. Karmakar, M. Majee, and N. Sanan-Mishra. 2018. 'Expression dynamics of miRNAs and their targets in seed germination conditions reveals miRNA-ta-siRNA crosstalk as regulator of seed germination', *Sci Rep*, 8: 13.  
Google Scholar: [Author Only](#) [Title Only](#) [Author and Title](#)
- de Folter, S., R. G. Immink, M. Kieffer, L. Parenicova, S. R. Henz, D. Weigel, M. Busscher, M. Kooiker, L. Colombo, M. M. Kater, B. Davies, and G. C. Angenent. 2005. 'Comprehensive interaction map of the Arabidopsis MADS Box transcription factors', *Plant Cell*, 17: 1424-33.  
Google Scholar: [Author Only](#) [Title Only](#) [Author and Title](#)
- de Meaux, J., J. Y. Hu, U. Tartler, and U. Goebel. 2008. 'Structurally different alleles of the ath-MIR824 microRNA precursor are maintained at high frequency in *Arabidopsis thaliana*', *Proc Natl Acad Sci U S A*, 105: 8994-99.  
Google Scholar: [Author Only](#) [Title Only](#) [Author and Title](#)
- Deng, Weiwei, Hua Ying, Chris A. Helliwell, Jennifer M. Taylor, W. James Peacock, and Elizabeth S. Dennis. 2011. 'FLOWERING LOCUS C (FLC) regulates development pathways throughout the life cycle of *Arabidopsis*', *Proc Natl Acad Sci U S A*, 108: 6680-85.  
Google Scholar: [Author Only](#) [Title Only](#) [Author and Title](#)
- Fahlgren, N., M. D. Howell, K. D. Kasschau, E. J. Chapman, C. M. Sullivan, J. S. Cumbie, S. A. Givan, T. F. Law, S. R. Grant, J. L. Dangel, and J. C. Carrington. 2007. 'High-throughput sequencing of *Arabidopsis* microRNAs: evidence for frequent birth and death of MIRNA genes', *PLoS One*, 2: e219.  
Google Scholar: [Author Only](#) [Title Only](#) [Author and Title](#)
- Fornara, F., A. de Montaigu, and G. Coupland. 2010. 'SnapShot: Control of flowering in *Arabidopsis*', *Cell*, 141: 550, 50 e1-2.  
Google Scholar: [Author Only](#) [Title Only](#) [Author and Title](#)
- Gregis, Veronica, Fernando Andres, Alice Sessa, Rosalinda Guerra, Sara Simonini, Julieta Mateos, Stefano Torti, Federico Zambelli, Gian Prazzoli, Katrine Bjerkan, Paul Grini, Giulio Pavesi, Lucia Colombo, George Coupland, and Martin Kater. 2013. 'Identification of pathways directly regulated by SHORT VEGETATIVE PHASE during vegetative and reproductive development in *Arabidopsis*', *Genom Biol*, 14: R56.  
Google Scholar: [Author Only](#) [Title Only](#) [Author and Title](#)

Heinz, S., C. Benner, N. Spann, E. Bertolino, Y. C. Lin, P. Laslo, J. X. Cheng, C. Murre, H. Singh, and C. K. Glass. 2010. 'Simple Combinations of Lineage-Determining Transcription Factors Prime cis-Regulatory Elements Required for Macrophage and B Cell Identities', *Molecular cell*, 38: 576-89.

Google Scholar: [Author Only](#) [Title Only](#) [Author and Title](#)

Hu, J. Y., Y. Zhou, F. He, X. Dong, L. Y. Liu, G. Coupland, F. Turck, and J. de Meaux. 2014. 'miR824-Regulated AGAMOUS-LIKE16 Contributes to Flowering Time Repression in Arabidopsis', *Plant Cell*, 26: 2024-37.

Google Scholar: [Author Only](#) [Title Only](#) [Author and Title](#)

Hwang, Keumbi, Hendry Susila, Zeeshan Nasim, Ji-Yul Jung, and Ji Hoon Ahn. 2019. 'Arabidopsis ABF3 and ABF4 Transcription Factors Act with the NF-YC Complex to Regulate SOC1 Expression and Mediate Drought-Accelerated Flowering', *Molecular Plant*, 12: 489-505.

Google Scholar: [Author Only](#) [Title Only](#) [Author and Title](#)

Hyun, Y., R. Richter, C. Vincent, R. Martinez-Gallegos, A. Porri, and G. Coupland. 2016. 'Multi-layered Regulation of SPL15 and Cooperation with SOC1 Integrate Endogenous Flowering Pathways at the Arabidopsis Shoot Meristem', *Developmental Cell*, 37: 254-66.

Google Scholar: [Author Only](#) [Title Only](#) [Author and Title](#)

Immink, R. G., I. A. Tonaco, S. de Folter, A. Shchennikova, A. D. van Dijk, J. Busscher-Lange, J. W. Borst, and G. C. Angenent. 2009. 'SEPALLATA3: the 'glue' for MADS box transcription factor complex formation', *Genome Biol*, 10: R24.

Google Scholar: [Author Only](#) [Title Only](#) [Author and Title](#)

Immink, Richard G.H., David Posé, Silvia Ferrario, Felix Ott, Kerstin Kaufmann, Felipe Leal Valentim, Stefan de Folter, Froukje van der Wal, Aalt D.J. van Dijk, Markus Schmid, and Gerco C. Angenent. 2012. 'Characterization of SOC1's Central Role in Flowering by the Identification of Its Upstream and Downstream Regulators', *Plant physiology*, 160: 433-49.

Google Scholar: [Author Only](#) [Title Only](#) [Author and Title](#)

Johanson, Urban, Joanne West, Clare Lister, Scott Michaels, Richard Amasino, and Caroline Dean. 2000. 'Molecular Analysis of FRIGIDA, a Major Determinant of Natural Variation in Arabidopsis Flowering Time', *Science*, 290: 344-47.

Google Scholar: [Author Only](#) [Title Only](#) [Author and Title](#)

Jung, J. H., Y. Ju, P. J. Seo, J. H. Lee, and C. M. Park. 2012. 'The SOC1-SPL module integrates photoperiod and gibberellic acid signals to control flowering time in Arabidopsis', *Plant J*, 69: 577-88.

Google Scholar: [Author Only](#) [Title Only](#) [Author and Title](#)

Jung, J. H., Y. H. Seo, P. J. Seo, J. L. Reyes, J. Yun, N. H. Chua, and C. M. Park. 2007. 'The GIGANTEA-regulated microRNA172 mediates photoperiodic flowering independent of CONSTANS in Arabidopsis', *Plant Cell*, 19: 2736-48.

Google Scholar: [Author Only](#) [Title Only](#) [Author and Title](#)

Kaufmann, K., J. M. Muino, R. Jauregui, C. A. Airoidi, C. Smaczniak, P. Krajewski, and G. C. Angenent. 2009. 'Target genes of the MADS transcription factor SEPALLATA3: integration of developmental and hormonal pathways in the Arabidopsis flower', *PLoS Biol*, 7: e1000090.

Google Scholar: [Author Only](#) [Title Only](#) [Author and Title](#)

Kaufmann, K., F. Wellmer, J. M. Muino, T. Ferrier, S. E. Wuest, V. Kumar, A. Serrano-Mislata, F. Madueno, P. Krajewski, E. M. Meyerowitz, G. C. Angenent, and J. L. Riechmann. 2010. 'Orchestration of floral initiation by APETALA1', *Science*, 328: 85-9.

Google Scholar: [Author Only](#) [Title Only](#) [Author and Title](#)

Kazan, Kemal, and John M. Manners. 2013. 'MYC2: The Master in Action', *Molecular Plant*, 6: 686-703.

Google Scholar: [Author Only](#) [Title Only](#) [Author and Title](#)

Kim, D., J. M. Paggi, C. Park, C. Bennett, and S. L. Salzberg. 2019. 'Graph-based genome alignment and genotyping with HISAT2 and HISAT-genotype', *Nature Biotechnology*, 37: 907-+.

Google Scholar: [Author Only](#) [Title Only](#) [Author and Title](#)

Kimura, Yuriko, Saya Aoki, Eigo Ando, Ayaka Kitatsuji, Aiko Watanabe, Masato Ohnishi, Koji Takahashi, Shin-ichiro Inoue, Norihito Nakamichi, Yosuke Tamada, and Toshinori Kinoshita. 2015. 'A flowering integrator, SOC1, affects stomatal opening in Arabidopsis thaliana', *Plant and Cell Physiology*, 56: 640-49.

Google Scholar: [Author Only](#) [Title Only](#) [Author and Title](#)

Koornneef, M., L. Bentsink, and H. Hilhorst. 2002. 'Seed dormancy and germination', *Curr Opin Plant Biol*, 5: 33-6.

Google Scholar: [Author Only](#) [Title Only](#) [Author and Title](#)

Kutter, C., H. Schob, M. Stadler, F. Meins, Jr., and A. Si-Ammour. 2007. 'MicroRNA-mediated regulation of stomatal development in Arabidopsis', *Plant Cell*, 19: 2417-29.

Google Scholar: [Author Only](#) [Title Only](#) [Author and Title](#)

Lee, J., and I. Lee. 2010. 'Regulation and function of SOC1, a flowering pathway integrator', *Journal of Experimental Botany*, 61: 2247-54.

Google Scholar: [Author Only](#) [Title Only](#) [Author and Title](#)

Lee, J., M. Oh, H. Park, and I. Lee. 2008. 'SOC1 translocated to the nucleus by interaction with AGL24 directly regulates leafy', *Plant J*, 55: 832-43.

Google Scholar: [Author Only](#) [Title Only](#) [Author and Title](#)

Lefebvre, Valérie, Helen North, Anne Frey, Bruno Sotta, Mitsunori Seo, Masanori Okamoto, Eiji Nambara, and Annie Marion-Poll. 2006. 'Functional analysis of Arabidopsis NCED6 and NCED9 genes indicates that ABA synthesized in the endosperm is involved in the induction of seed dormancy', *The Plant Journal*, 45: 309-19.

Google Scholar: [Author Only](#) [Title Only](#) [Author and Title](#)

Li, D., C. Liu, L. Shen, Y. Wu, H. Chen, M. Robertson, C. A. Helliwell, T. Ito, E. Meyerowitz, and H. Yu. 2008. 'A repressor complex governs the integration of flowering signals in Arabidopsis', *Dev Cell*, 15: 110-20.

Google Scholar: [Author Only](#) [Title Only](#) [Author and Title](#)

Li, H. 2013. 'Aligning sequence reads, clone sequences and assembly contigs with BWA-MEM', arXiv: 1303.3997.

Google Scholar: [Author Only](#) [Title Only](#) [Author and Title](#)

Li, H., B. Handsaker, A. Wysoker, T. Fennell, J. Ruan, N. Homer, G. Marth, G. Abecasis, R. Durbin, and Proc Genome Project Data. 2009. 'The Sequence Alignment/Map format and SAMtools', *Bioinformatics*, 25: 2078-79.

Google Scholar: [Author Only](#) [Title Only](#) [Author and Title](#)

Li, Hui, Keyi Ye, Yiting Shi, Jinkui Cheng, Xiaoyan Zhang, and Shuhua Yang. 2017. 'BZR1 Positively Regulates Freezing Tolerance via CBF-Dependent and CBF-Independent Pathways in Arabidopsis', *Molecular Plant*, 10: 545-59.

Google Scholar: [Author Only](#) [Title Only](#) [Author and Title](#)

Liao, Y., G. K. Smyth, and W. Shi. 2014. 'featureCounts: an efficient general purpose program for assigning sequence reads to genomic features', *Bioinformatics*, 30: 923-30.

Google Scholar: [Author Only](#) [Title Only](#) [Author and Title](#)

Liao, Yang, Gordon K. Smyth, and Wei Shi. 2013. 'The Subread aligner: fast, accurate and scalable read mapping by seed-and-vote', *Nucleic Acids Research*, 41.

Liu, Tongkun, Ying Li, Jun Ren, Yu Qian, Xuedong Yang, WeiKe Duan, and Xilin Hou. 2013. 'Nitrate or NaCl regulates floral induction in Arabidopsis thaliana', *Biologia*, 68: 215-22.

Google Scholar: [Author Only](#) [Title Only](#) [Author and Title](#)

Machanick, P., and T. L. Bailey. 2011. 'MEME-ChIP: motif analysis of large DNA datasets', *Bioinformatics*, 27: 1696-97.

Google Scholar: [Author Only](#) [Title Only](#) [Author and Title](#)

Mateos, Julieta L., Vicky Tilmes, Pedro Madrigal, Edouard Severing, René Richter, Colin W. M. Rijkenberg, Paweł Krajewski, and George Coupland. 2017. 'Divergence of regulatory networks governed by the orthologous transcription factors FLC and PEP1 in Brassicaceae species', *Proceedings of the National Academy of Sciences*, 114: E11037-E46.

Google Scholar: [Author Only](#) [Title Only](#) [Author and Title](#)

Mateos, Julieta, Pedro Madrigal, Kenichi Tsuda, Vimal Rawat, Rene Richter, Maida Romera-Branchat, Fabio Fornara, Korbinian Schneeberger, Pawe Krajewski, and George Coupland. 2015. 'Combinatorial activities of SHORT VEGETATIVE PHASE and FLOWERING LOCUS C define distinct modes of flowering regulation in Arabidopsis', *Genome Biology*, 16: 31.

Google Scholar: [Author Only](#) [Title Only](#) [Author and Title](#)

Mathieu, J., L. J. Yant, F. Murdter, F. Kuttner, and M. Schmid. 2009. 'Repression of flowering by the miR172 target SMZ', *PLoS Biol*, 7: e1000148.

Google Scholar: [Author Only](#) [Title Only](#) [Author and Title](#)

Mi, H. Y., X. S. Huang, A. Muruganujan, H. M. Tang, C. Mills, D. Kang, and P. D. Thomas. 2017. 'PANTHER version 11: expanded annotation data from Gene Ontology and Reactome pathways, and data analysis tool enhancements', *Nucleic Acids Research*, 45: D183-D89.

Google Scholar: [Author Only](#) [Title Only](#) [Author and Title](#)

Michaels, S. D. 2009. 'Flowering time regulation produces much fruit', *Curr Opin Plant Biol*, 12: 75-80.

Google Scholar: [Author Only](#) [Title Only](#) [Author and Title](#)

Michaels, S. D., and R. M. Amasino. 2001. 'Loss of FLOWERING LOCUS C activity eliminates the late-flowering phenotype of FRIGIDA and autonomous pathway mutations but not responsiveness to vernalization', *Plant Cell*, 13: 935-41.

Google Scholar: [Author Only](#) [Title Only](#) [Author and Title](#)

Nee, G., Y. Xiang, and W. J. J. Soppe. 2017. 'The release of dormancy, a wake-up call for seeds to germinate', *Current Opinion in Plant Biology*, 35: 8-14.

Google Scholar: [Author Only](#) [Title Only](#) [Author and Title](#)

Olas, Justyna Jadwiga, Judith Van Dingenen, Christin Abel, Magdalena Anna Dzialo, Regina Feil, Anne Krapp, Armin Schlereth, and Vanessa Wahl. 2019. 'Nitrate acts at the Arabidopsis thaliana shoot apical meristem to regulate flowering time', *The New phytologist*, 223: 814-27.

Google Scholar: [Author Only](#) [Title Only](#) [Author and Title](#)

Pajoro, Alice, Pedro Madrigal, Jose M. Muiño, José Tomás Matus, Jian Jin, Martin A. Mecchia, Juan M. Debernardi, Javier F. Palatnik, Salma Balazadeh, Muhammad Arif, Diarmuid S. Ó'Maoiléidigh, Frank Wellmer, Paweł Krajewski, José-Luis Riechmann, Gerco C. Angenent, and Kerstin Kaufmann. 2014. 'Dynamics of chromatin accessibility and gene regulation by MADS-domain transcription



**factors in flower development', *Genome Biology*, 15: R41.**

Google Scholar: [Author Only Title Only Author and Title](#)

**Rajagopalan, R., H. Vaucheret, J. Trejo, and D. P. Bartel. 2006. 'A diverse and evolutionarily fluid set of microRNAs in *Arabidopsis thaliana*', *Genes Dev*, 20: 3407-25.**

Google Scholar: [Author Only Title Only Author and Title](#)

**Reimer, J. J., and F. Turck. 2010. 'Genome-wide mapping of protein-DNA interaction by chromatin immunoprecipitation and DNA microarray hybridization (ChIP-chip). Part A: ChIP-chip molecular methods', *Methods Mol Biol*, 631: 139-60.**

Google Scholar: [Author Only Title Only Author and Title](#)

**Richter, Rene, Atsuko Kinoshita, Coral Vincent, Rafael Martinez-Gallegos, He Gao, Annabel D. van Driel, Youbong Hyun, Julieta L. Mateos, and George Coupland. 2019. 'Floral regulators FLC and SOC1 directly regulate expression of the B3-type transcription factor TARGET OF FLC AND SVP 1 at the *Arabidopsis* shoot apex via antagonistic chromatin modifications', *PLoS genetics*, 15: e1008065.**

Google Scholar: [Author Only Title Only Author and Title](#)

**Searle, I., Y. He, F. Turck, C. Vincent, F. Fornara, S. Krober, R. A. Amasino, and G. Coupland. 2006. 'The transcription factor FLC confers a flowering response to vernalization by repressing meristem competence and systemic signaling in *Arabidopsis*', *Genes Dev*, 20: 898-912.**

Google Scholar: [Author Only Title Only Author and Title](#)

**Tao, Z., L. S. Shen, C. Liu, L. Liu, Y. Y. Yan, and H. Yu. 2012. 'Genome-wide identification of SOC1 and SVP targets during the floral transition in *Arabidopsis*', *Plant Journal*, 70: 549-61.**

Google Scholar: [Author Only Title Only Author and Title](#)

**Thorvaldsdottir, H., J. T. Robinson, and J. P. Mesirov. 2013. 'Integrative Genomics Viewer (IGV): high-performance genomics data visualization and exploration', *Briefings in Bioinformatics*, 14: 178-92.**

Google Scholar: [Author Only Title Only Author and Title](#)

**Tian, T., Y. Liu, H. Y. Yan, Q. You, X. Yi, Z. Du, W. Y. Xu, and Z. Su. 2017. 'agriGO v2.0: a GO analysis toolkit for the agricultural community, 2017 update', *Nucleic Acids Research*, 45: W122-W29.**

Google Scholar: [Author Only Title Only Author and Title](#)

**Torti, Stefano, Fabio Fornara, Coral Vincent, Fernando Andrés, Karl Nordström, Ulrike Göbel, Daniela Knoll, Heiko Schoof, and George Coupland. 2012. 'Analysis of the *Arabidopsis* Shoot Meristem Transcriptome during Floral Transition Identifies Distinct Regulatory Patterns and a Leucine-Rich Repeat Protein That Promotes Flowering', *Plant Cell*, 24: 444-62.**

Google Scholar: [Author Only Title Only Author and Title](#)

**Wang, Houping, Yang Li, Jinjing Pan, Dengji Lou, Yanru Hu, and Diqiu Yu. 2017. 'The bHLH Transcription Factors MYC2, MYC3, and MYC4 Are Required for Jasmonate-Mediated Inhibition of Flowering in *Arabidopsis*', *Molecular Plant*, 10: 1461-64.**

Google Scholar: [Author Only Title Only Author and Title](#)

**Xiang, Y., K. Nakabayashi, J. Ding, F. He, L. Bentsink, and W. J. J. Soppe. 2014. 'REDUCED DORMANCY5 Encodes a Protein Phosphatase 2C That Is Required for Seed Dormancy in *Arabidopsis*', *Plant Cell*, 26: 4362-75.**

Google Scholar: [Author Only Title Only Author and Title](#)

**Xiao, C. W., F. L. Chen, X. H. Yu, C. T. Lin, and Y. F. Fu. 2009. 'Over-expression of an AT-hook gene, AHL22, delays flowering and inhibits the elongation of the hypocotyl in *Arabidopsis thaliana*', *Plant Molecular Biology*, 71: 39-50.**

Google Scholar: [Author Only Title Only Author and Title](#)

**Yan, Fei-Hong, Li-Ping Zhang, Fang Cheng, Dong-Mei Yu, and Jin-Yong Hu. 2021. 'Accession-specific flowering time variation in response to nitrate fluctuation in *Arabidopsis thaliana*', *Plant Diversity*, 43: 78-85.**

Google Scholar: [Author Only Title Only Author and Title](#)

**Yu, G. C., L. G. Wang, and Q. Y. He. 2015. 'ChIPseeker: an R/Bioconductor package for ChIP peak annotation, comparison and visualization', *Bioinformatics*, 31: 2382-83.**

Google Scholar: [Author Only Title Only Author and Title](#)

**Zhai, Qingzhe, Xin Zhang, Fangming Wu, Hailong Feng, Lei Deng, Li Xu, Min Zhang, Qiaomei Wang, and Chuanyou Li. 2015. 'Transcriptional Mechanism of Jasmonate Receptor CO1-Mediated Delay of Flowering Time in *Arabidopsis*', *The Plant Cell*, 27: 2814-28.**

Google Scholar: [Author Only Title Only Author and Title](#)

**Zhang, Y., T. Liu, C. A. Meyer, J. Eeckhoute, D. S. Johnson, B. E. Bernstein, C. Nussbaum, R. M. Myers, M. Brown, W. Li, and X. S. Liu. 2008. 'Model-based Analysis of ChIP-Seq (MACS)', *Genome Biology*, 9: 9.**

Google Scholar: [Author Only Title Only Author and Title](#)

**Zhao, C., A. Hanada, S. Yamaguchi, Y. Kamiya, and E. P. Beers. 2011. 'The *Arabidopsis* Myb genes MYR1 and MYR2 are redundant negative regulators of flowering time under decreased light intensity', *Plant J*, 66: 502-15.**

Google Scholar: [Author Only Title Only Author and Title](#)

**Zhao, Ping-Xia, Zi-Qing Miao, Jing Zhang, Si-Yan Chen, Qian-Qian Liu, and Cheng-Bin Xiang. 2020. 'MADS-box factor AGL16 negatively regulates drought resistance via stomatal density and stomatal movement', *Journal of Experimental Botany*, 71: 6092-610 .**

bioRxiv preprint doi: <https://doi.org/10.1101/2021.05.10.443448>; this version posted May 10, 2021. The copyright holder for this preprint (which was not certified by peer review) is the author/funder, who has granted bioRxiv a license to display the preprint in perpetuity. It is made available under a [CC-BY-NC-ND 4.0 International license](#).

Google Scholar: [Author Only](#) [Title Only](#) [Author and Title](#)

**Zhou, Yue, Benjamin Hartwig, Geo Velikkakam James, Korbinian Schneeberger, and Franziska Turck. 2016. 'Complementary Activities of TELOMERE REPEAT BINDING Proteins and Polycomb Group Complexes in Transcriptional Regulation of Target Genes', *The Plant Cell*, 28: 87-101.**

Google Scholar: [Author Only](#) [Title Only](#) [Author and Title](#)

**Supporting information**
